# Supplementary material for: Prevalence of Worry-Induced Sleep Disturbance and Associated Factors among a National Sample of In-School Adolescents in Lebanon
Source: MDPI journal article supplement (doi:10.3390/bs10100148), 2020-09-27
Supplement: s1 [file s1]

## Supplementary file 1: Variable description

| Variables                           | Question                                                                                                                                                                                                                                                                                               | Response options (coding scheme)                                                   |
|-------------------------------------|--------------------------------------------------------------------------------------------------------------------------------------------------------------------------------------------------------------------------------------------------------------------------------------------------------|------------------------------------------------------------------------------------|
| Anxiety                             | “During the past 12 months, how often have you been so worried about something that you could not sleep at night?”                                                                                                                                                                                     | “1=never to 5=always (coded 1–3=0 and 4–5=1)”                                      |
| Age                                 | “How old are you?”                                                                                                                                                                                                                                                                                     | “11 years old or younger to 18 years old or older”                                 |
| Sex                                 | “What is your sex?”                                                                                                                                                                                                                                                                                    | “Male, Female”                                                                     |
| <i>Psychosocial distress</i>        |                                                                                                                                                                                                                                                                                                        |                                                                                    |
| No close friends                    | “How many close friends do you have?”                                                                                                                                                                                                                                                                  | “1 = 0 to 4 = 3 or more (coded 1+=0, 0=1)”                                         |
| Loneliness                          | “During the past 12 months, how often have you felt lonely?”                                                                                                                                                                                                                                           | “1=never to 5=always (coded 1–3=0 and 4–5=1)”                                      |
| Bullied                             | “During the past 30 days, on how many days were you bullied?”                                                                                                                                                                                                                                          | “1=0 days to 7=All 30 days”                                                        |
| Physically attacked                 | “During the past 12 months, how many times were you physically attacked?”                                                                                                                                                                                                                              | “1=0 times to 8=12 or more times”                                                  |
| Physical fights                     | “During the past 12 months, how many times were you in a physical fight?”                                                                                                                                                                                                                              | “1=0 times to 8=12 or more times”                                                  |
| <i>Social-environmental factors</i> |                                                                                                                                                                                                                                                                                                        |                                                                                    |
| Hunger                              | “During the past 30 days, how often did you go hungry because there was not enough food in your home?”                                                                                                                                                                                                 | “1 = never to 5 = always (coded 1-3=0 and 4-5=1)”                                  |
| Peer support                        | “During the past 30 days, how often were most of the students in your school kind and helpful?”                                                                                                                                                                                                        | “1=never to 5=always (coded 1-2=1, 3–5=0)”                                         |
| Parental supervision                | “During the past 30 days, how often did your parents or guardians check to see if your homework was done?”                                                                                                                                                                                             | “1=never to 5=always (coded 1=1 and 2–5=0)”                                        |
| Parental emotional neglect          | “During the past 30 days, how often did your parents or guardians understand your problems and worries?”                                                                                                                                                                                               | “1=never to 5=always (coded 1=1 and 2–5=0)”                                        |
|                                     | “During the past 30 days, how often did your parents or guardians really know what you were doing with your free time?”                                                                                                                                                                                | “1=never to 5=always (coded 1-2=1 and 3-5=0)”                                      |
| Parental disrespect for privacy     | “During the past 30 days, how often did your parents or guardians go through your things without your approval?”                                                                                                                                                                                       | “1=never to 5=always (coded 1–3=0 and 4–5=1)”                                      |
| Passive smoking                     | “During the past 7 days, on how many days have people smoked in your presence?”                                                                                                                                                                                                                        | “1=0 days to 5=all 7 days”                                                         |
| School truancy                      | “During the past 30 days, on how many days did you miss classes or school without permission?”                                                                                                                                                                                                         | “1=0 days to 5= 10 or more days”                                                   |
| <i>Health risk behaviours</i>       |                                                                                                                                                                                                                                                                                                        |                                                                                    |
| Drunk                               | “During your life, how many times did you drink so much alcohol that you were really drunk?”                                                                                                                                                                                                           | “1=0 times to 4=0 or more times (coded 1=0 and 2-4=1)”                             |
| Current tobacco use                 | “During the past 30 days, on how many days did you smoke cigarettes/use any tobacco products other than cigarettes, such as a narghile or waterpipe?”                                                                                                                                                  | “1=0 days to 7=All 30 days (coded 1=0 and 2-7=1)”                                  |
| Cannabis use                        | “During your life, how many times have you used marijuana (also called hash or hashish)?”                                                                                                                                                                                                              | 1=0 times to 5=20 or more times) (coded 1=0 and 2-4=1)”                            |
| Leisure-time sedentary behavior     | “How much time do you spend during a typical or usual day sitting and watching television, playing computer games, talking with friends, or doing other sitting activities, such as playing with a PC or video games, playing on an Ipad or other tablet, or chatting with your friends on the phone?” | “1=Less than 1 hour per day... 3= 3 to 4 hours per day ...6=8 or more hours a day” |
| Soft drink intake                   | “During the past 30 days, how many times per day did you usually drink carbonated soft drinks, such as Pepsi, Coca Cola, Fanta, or 7-Up? (Do not include diet soft drinks.)”                                                                                                                           | “1=0 times to 7=5 or more times (coded 1-2=0 and 3-7, 2 or more times)”            |
| Fast food consumption               | “During the past 7 days, on how many days did you eat food from a fast food restaurant, such as hamburger, shawarma, falafel, pizza, or mnakish?”                                                                                                                                                      | “1=0 days to 8=7 days (coded 1-2=0 and 3-6=1, 2 or more days)”                     |
| Injury                              | “During the past 12 months, how many times were you seriously injured?”                                                                                                                                                                                                                                | “1=0 times to 8=12 or more times (coded 1=0 and 2–8=1)”                            |
